## Impact of coronary atherosclerotic plaque metrics and CT reader skills on inter-observer variation of repeated on-site CT-FFR

Vilades Medel D.<sup>1</sup>; Bos L.<sup>1</sup>; Jimenez Kockar M.<sup>1</sup>; Altisent O.<sup>2</sup>; Rodriguez O.<sup>2</sup>; Alomar X.<sup>3</sup>; Schuijf J.<sup>4</sup>; Leta R.<sup>1</sup>

<sup>1</sup>Hospital de la Santa Creu i Sant Pau, Department of Cardiology, Barcelona, Spain

<sup>2</sup>Germans Trias i Pujol University Hospital, Interventional Cardiology, Barcelona, Spain

<sup>3</sup>Clínica Creu Blanca, Barcelona, Spain

<sup>4</sup>Canon Medical Systems Europe B.V, Zoetermeer, Netherlands (The)

**Funding Acknowledgements:** Type of funding sources: None.

### Background and Purpose:

Little is known about the on-site CT-FFR inter-reader reproducibility and its variability in different atherosclerotic plaque scenarios. The aim of this study was to determine the variation of repeated CT-FFR analyses between two CCTA readers with different training skills across different atherosclerotic features.

### Methods:

Patients referred for invasive coronary angiography who accepted to undergo a CCTA/CT-FFR study were prospectively included. Patients with contraindications for CCTA, atrial fibrillation, chronic total occlusions or previous coronary revascularization were excluded. Quantification of atherosclerotic plaque metrics and CT-FFR was performed for each coronary vessel by two different CT readers, one Level I and one Level III. Inter-reader agreement for CT-FFR was assessed using kappa index, Bland-Altman and Lin's concordance correlation agreement (LCCA). The impact of each atherosclerotic feature was assessed by dividing the dataset based on the corresponding median and assessing inter-reader variability for both the lower and upper half.

**Results:** 47 patients (137 vessels) were included. Mean age was  $66 \pm 10$  years, 89% were males, 63% had hypertension, 76% dyslipidemia and 38% diabetes. Degree of stenosis was moderate (50-69%) in 29% and severe ( $\geq 70\%$ ) in 28% of vessels with a positive CT-FFR ( $\leq 0.80$ ) in 39%. CT-FFR showed good correlation between the two readers based on a kappa index of 0.77 with a mean CT-FFR difference of  $-0.017 \pm 0.12$ . The inter-reader agreement was good in the main epicardial vessels (LCCA of 0.70 for LAD, 0.74 for LCX and 0.76 for RCA,  $p < 0.001$  for all) and better in proximal than in distal segments (LCCA of 0.83 vs 0.63,  $p < 0.001$ ). Likewise, in different atherosclerotic plaque scenarios, the agreement was better in those vessels with lower plaque volume, less calcified and longer lesions (see table 1).

### Conclusions:

In our cohort, on-site CT-FFR showed good inter-reader agreement without relevant impact by reader experience level and atherosclerotic plaque features.

Table 1

|                                               | Mean difference Bland-Altman | Lin's concordance correlation coefficient | p value |
|-----------------------------------------------|------------------------------|-------------------------------------------|---------|
| Plaque volume < median (556 mm <sup>3</sup> ) | $-0.01 \pm 0.12$             | 0.85                                      | <0.001  |
| Plaque volume > median (556 mm <sup>3</sup> ) | $-0.035 \pm 0.13$            | 0.64                                      | <0.001  |
| Calcified plaque burden < median (34%)        | $-0.03 \pm 0.11$             | 0.82                                      | <0.001  |
| Calcified plaque burden > median (34%)        | $-0.02 \pm 0.14$             | 0.75                                      | <0.001  |
| Lesion length < median (55 mm)                | $-0.005 \pm 0.12$            | 0.68                                      | <0.001  |
| Lesion length > median (55 mm)                | $-0.031 \pm 0.12$            | 0.83                                      | <0.001  |

\*p values indicate inter-reader agreement by two independent observers for each category
